# Supplementary material for: Erythropoietin (EPO) haplotype associated with all-cause mortality in a cohort of Italian patients with Type-2 Diabetes
Source: PubMed Central journal article supplement (PMC6637129; doi:10.1038/s41598-019-46894-2), 2019-07-17
Supplement: 41598_2019_46894_MOESM1_ESM.pdf [file 41598_2019_46894_MOESM1_ESM.pdf]

**Erythropoietin (*EPO*) haplotype associated with all-cause mortality in a cohort of Italian patients with Type-2 Diabetes**

Alberto Montesano, Anna Rita Bonfigli, Maria De Luca, Paolina Crocco, Paolo Garagnani, Elena Marasco, Chiara Pirazzini, Cristina Giuliani, Fabio Romagnoli, Claudio Franceschi, Giuseppe Passarino, Roberto Testa, Fabiola Olivieri, Giuseppina Rose

**Table S1: List of the analyzed polymorphisms and their association with T2D survival**

| Gene                | CHR | SNP        | Major/Minor allele | MAF   | Chi-square* | p-value | q-value** |
|---------------------|-----|------------|--------------------|-------|-------------|---------|-----------|
| DDAH1               | 1   | rs13373844 | A/C                | 0.337 | 1.131       | 0.287   | 0.619     |
| DDAH1               | 1   | rs7521189  | A/G                | 0.457 | 0.209       | 0.647   | 0.799     |
| IRS1 (500 kb-3'UTR) | 2   | rs2943641  | C/T                | 0.399 | 0.341       | 0.558   | 0.744     |
| ADIPOQ              | 3   | rs266729   | C/G                | 0.248 | 0.122       | 0.726   | 0.804     |
| ADIPOQ-AS1          | 3   | rs1063539  | G/C                | 0.107 | 0.526       | 0.468   | 0.716     |
| IGF2BP2             | 3   | rs1470579  | A/C                | 0.355 | 0.371       | 0.542   | 0.744     |
| IGF2BP2             | 3   | rs4402960  | G/T                | 0.364 | 1.031       | 0.309   | 0.619     |
| TERC                | 3   | rs12696304 | C/G                | 0.273 | 0.318       | 0.572   | 0.744     |
| UCP1                | 4   | rs3811787  | T/G                | 0.258 | 3.599       | 0.057   | 0.250     |
| UCP1                | 4   | rs45539933 | C/T                | 0.064 | 0.099       | 0.752   | 0.804     |
| UCP1                | 4   | rs1800592  | A/G                | 0.239 | 1.476       | 0.224   | 0.632     |
| CLPTM1L             | 5   | rs401681   | C/T                | 0.414 | 0.524       | 0.468   | 0.716     |
| TERT                | 5   | rs2735940  | T/C                | 0.411 | 1.349       | 0.245   | 0.619     |
| TERT                | 5   | rs2736098  | G/A                | 0.298 | 0.780       | 0.377   | 0.700     |
| TERT                | 5   | rs2736109  | G/A                | 0.414 | 0.149       | 0.699   | 0.804     |
| VEGFA               | 6   | rs3025021  | C/T                | 0.332 | 0.093       | 0.760   | 0.804     |
| EPO                 | 7   | rs1617640  | T/G                | 0.322 | 7.696       | 0.005   | 0.072     |
| EPO                 | 7   | rs507392   | T/C                | 0.330 | 7.670       | 0.005   | 0.072     |
| EPO                 | 7   | rs551238   | A/C                | 0.324 | 6.417       | 0.011   | 0.097     |
| TCF7L2              | 10  | rs7903146  | C/T                | 0.446 | 2.620       | 0.105   | 0.342     |
| CAT                 | 11  | rs1001179  | G/A                | 0.215 | 0.595       | 0.440   | 0.716     |
| KCNJ11              | 11  | rs5215     | T/C                | 0.360 | 0.061       | 0.804   | 0.804     |
| UCP2                | 11  | rs660339   | C/T                | 0.342 | 2.783       | 0.095   | 0.342     |
| UCP3                | 11  | rs1800849  | C/T                | 0.166 | 5.261       | 0.021   | 0.141     |
| HIF1A               | 14  | rs11549465 | C/T                | 0.146 | 0.072       | 0.787   | 0.804     |
| FTO                 | 16  | rs8050136  | C/A                | 0.473 | 1.573       | 0.209   | 0.605     |
| FTO                 | 16  | rs9939609  | T/A                | 0.468 | 1.035       | 0.308   | 0.619     |
| FTO                 | 16  | rs1121980  | T/C                | 0.489 | 3.953       | 0.046   | 0.243     |
| FTO                 | 16  | rs1421085  | T/C                | 0.487 | 0.700       | 0.402   | 0.702     |
| FTO                 | 16  | rs17817449 | T/G                | 0.472 | 1.341       | 0.246   | 0.632     |
| APOE                | 19  | rs440446   | G/C                | 0.399 | 0.259       | 0.610   | 0.755     |

\*Chi-square value for the log-rank test

\*\* False discovery rate (FDR) P-values adjusted for the multiple comparisons (cut-off =0.10).

MAF: minor allele frequency

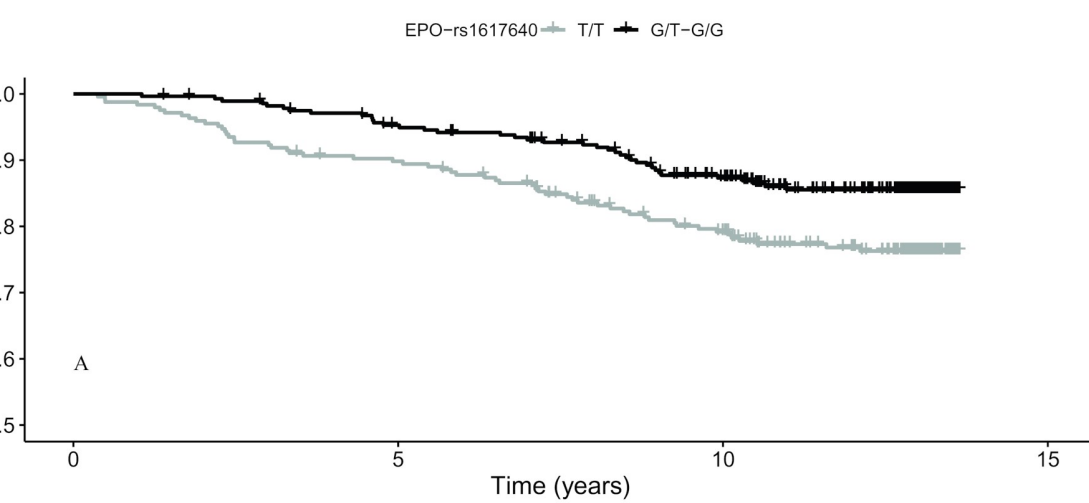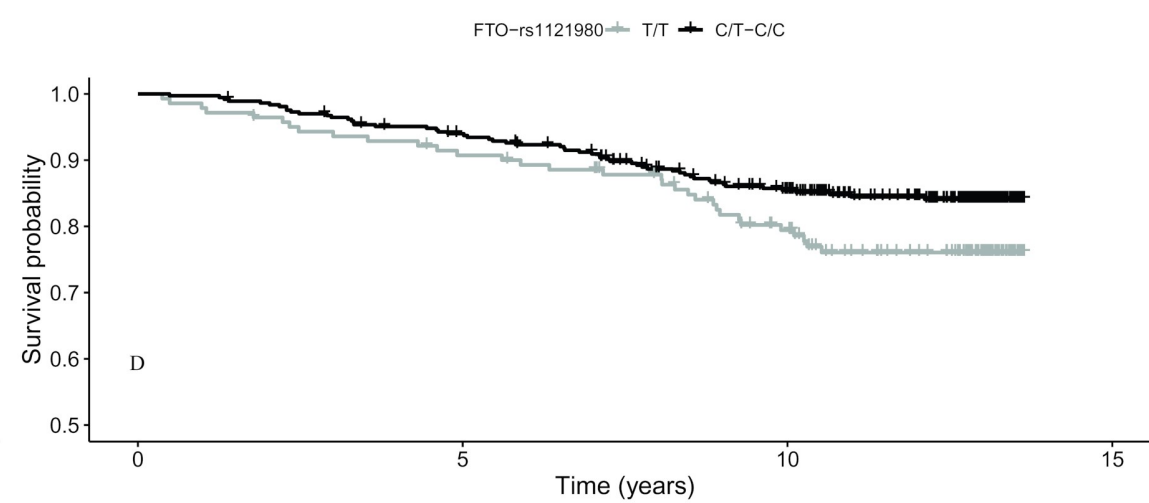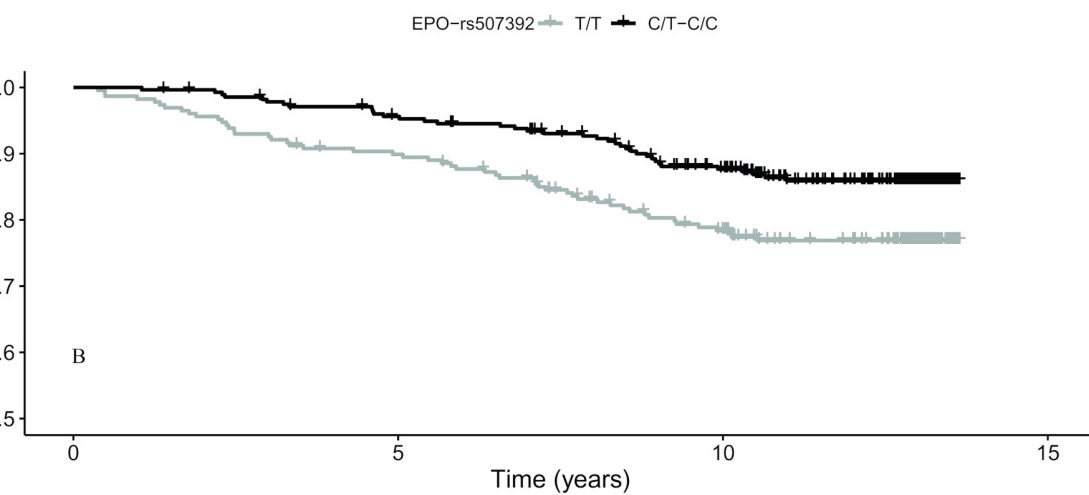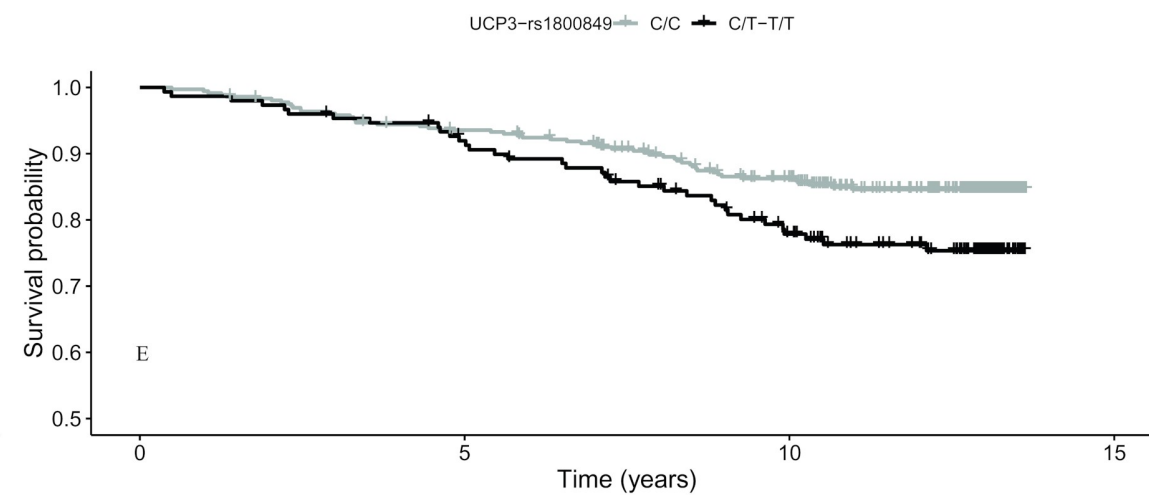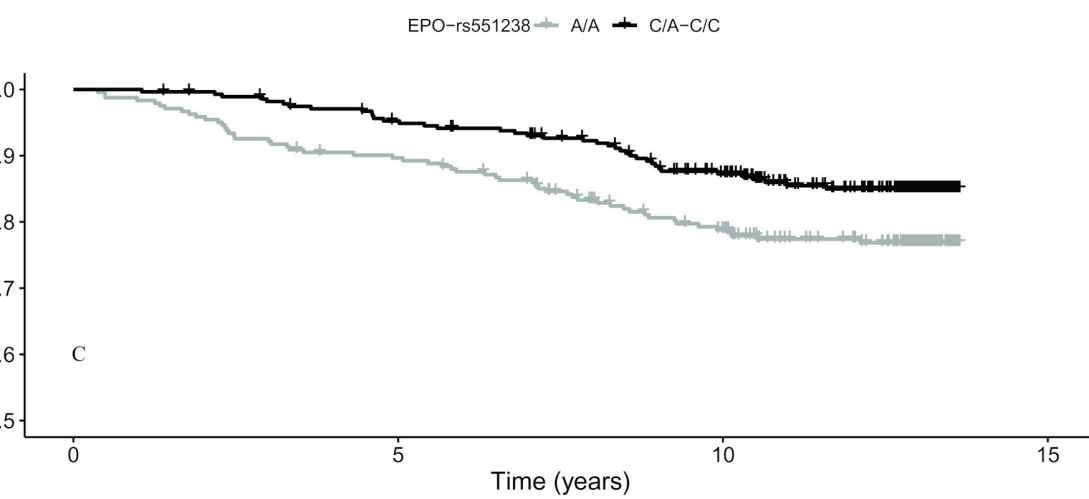

**Supplementary Figure S1.**

Kaplan–Meier survival analysis of T2D patients stratified according to carriers of minor allele (black) vs non carriers (grey) of EPO (A–C), FTO (D), UCP3 (E) variants. Time is expressed in years, where 0 is considered the time of recruitment.
